# Supplementary material
Source: PubMed Central journal article supplement (PMC3825789)
Supplement: NIHMS511374-supplement-1.pdf [file NIHMS511374-supplement-1.pdf]

Figure S1

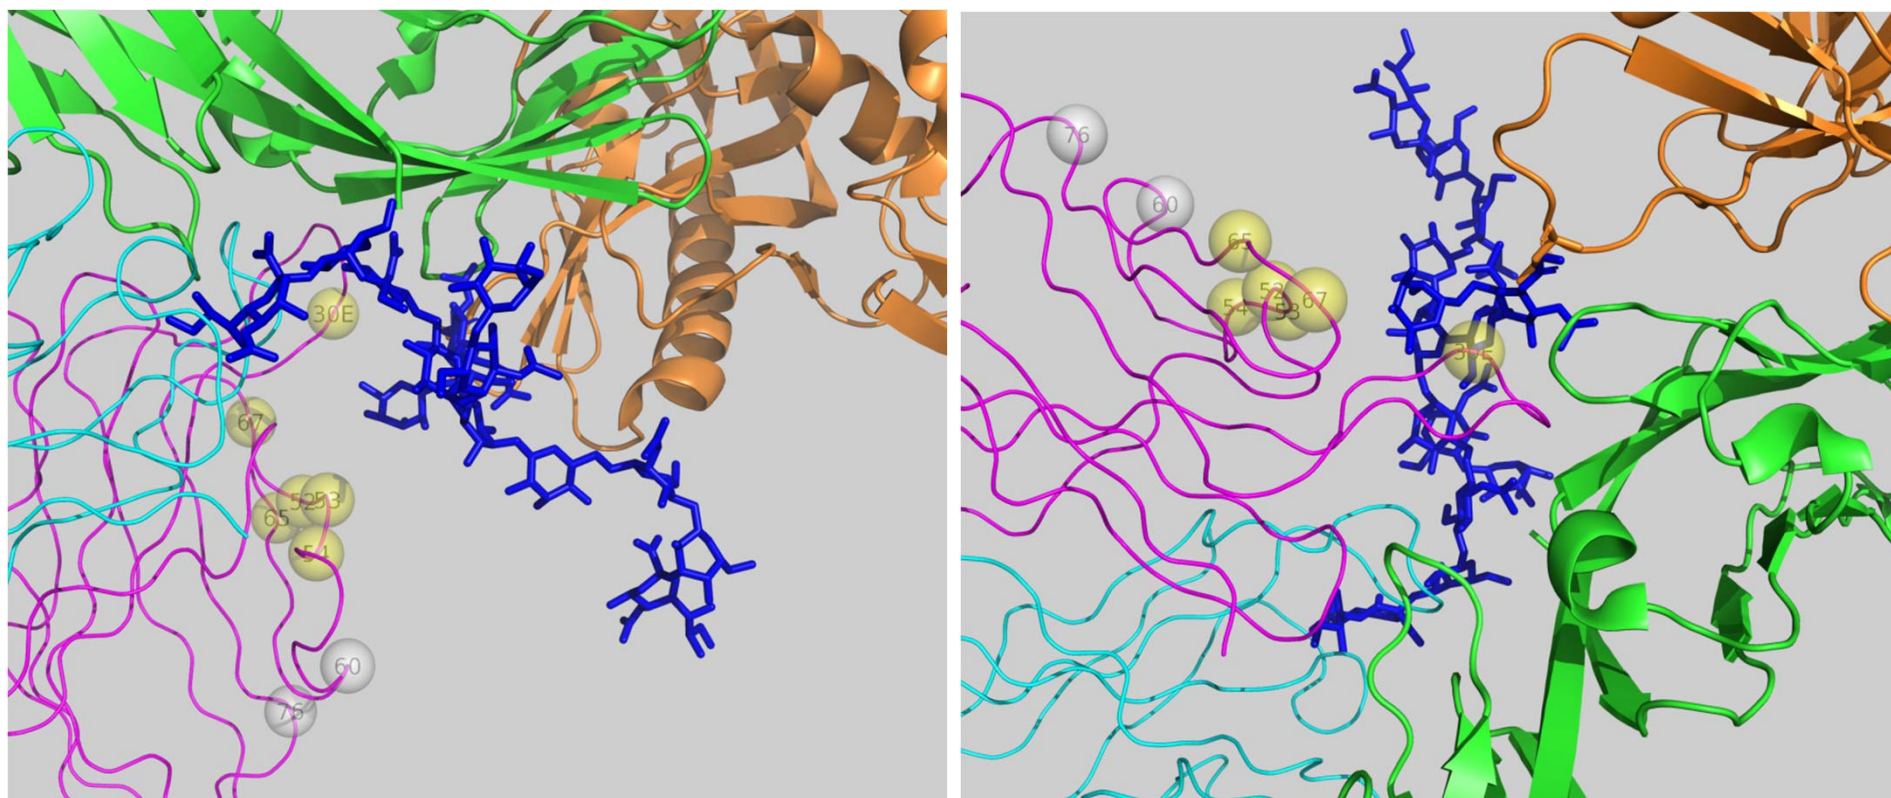

Figure S2

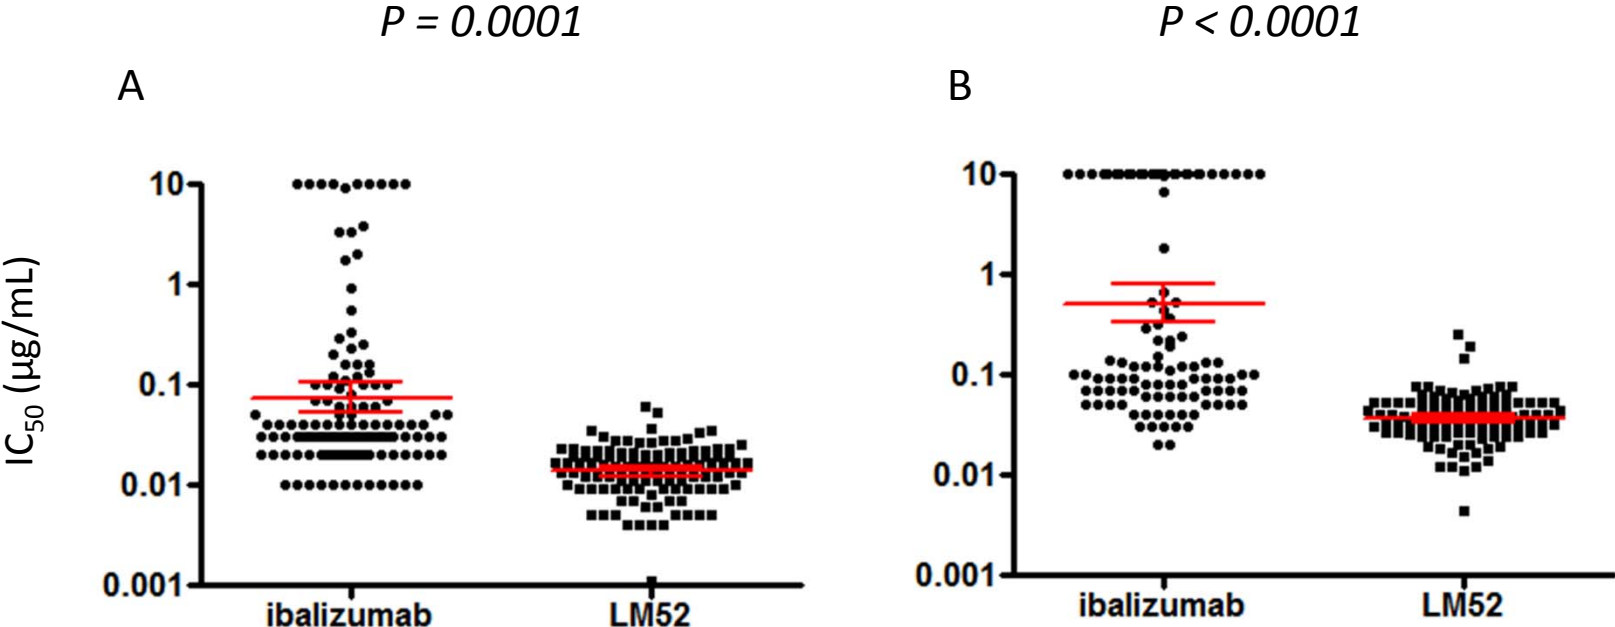

Figure S3

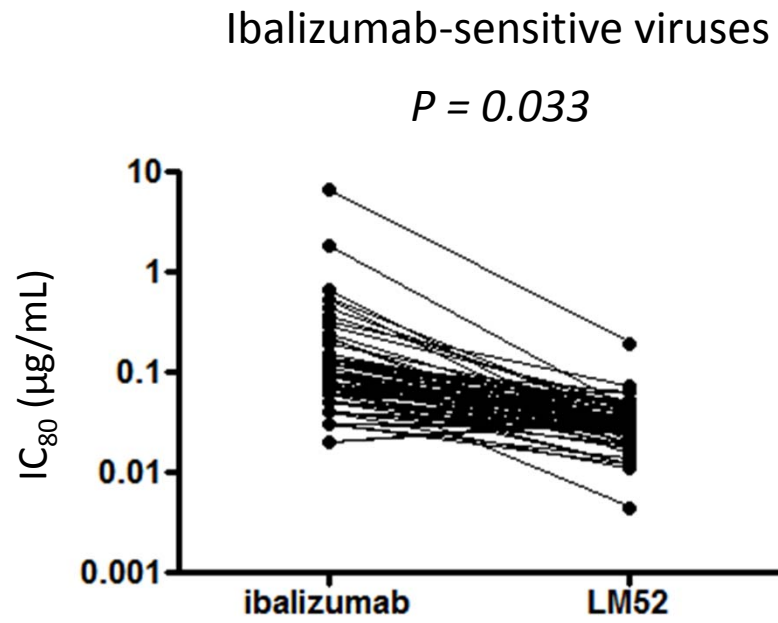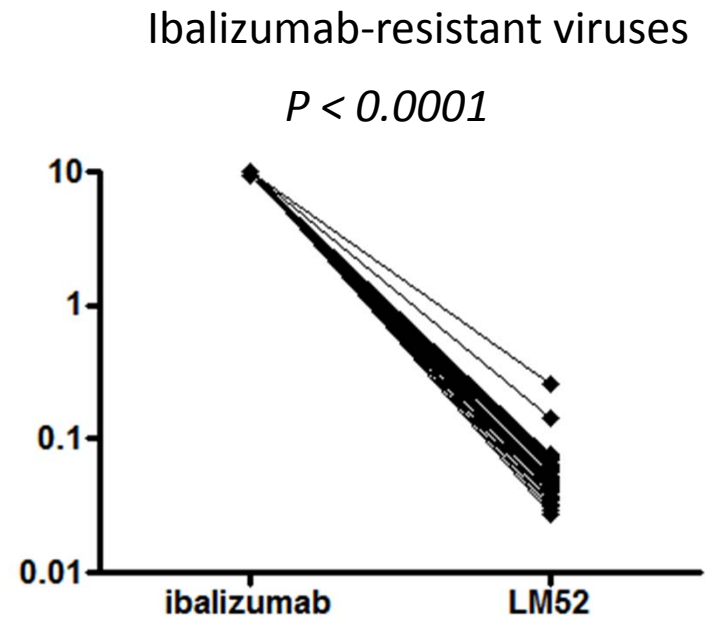

Figure S4

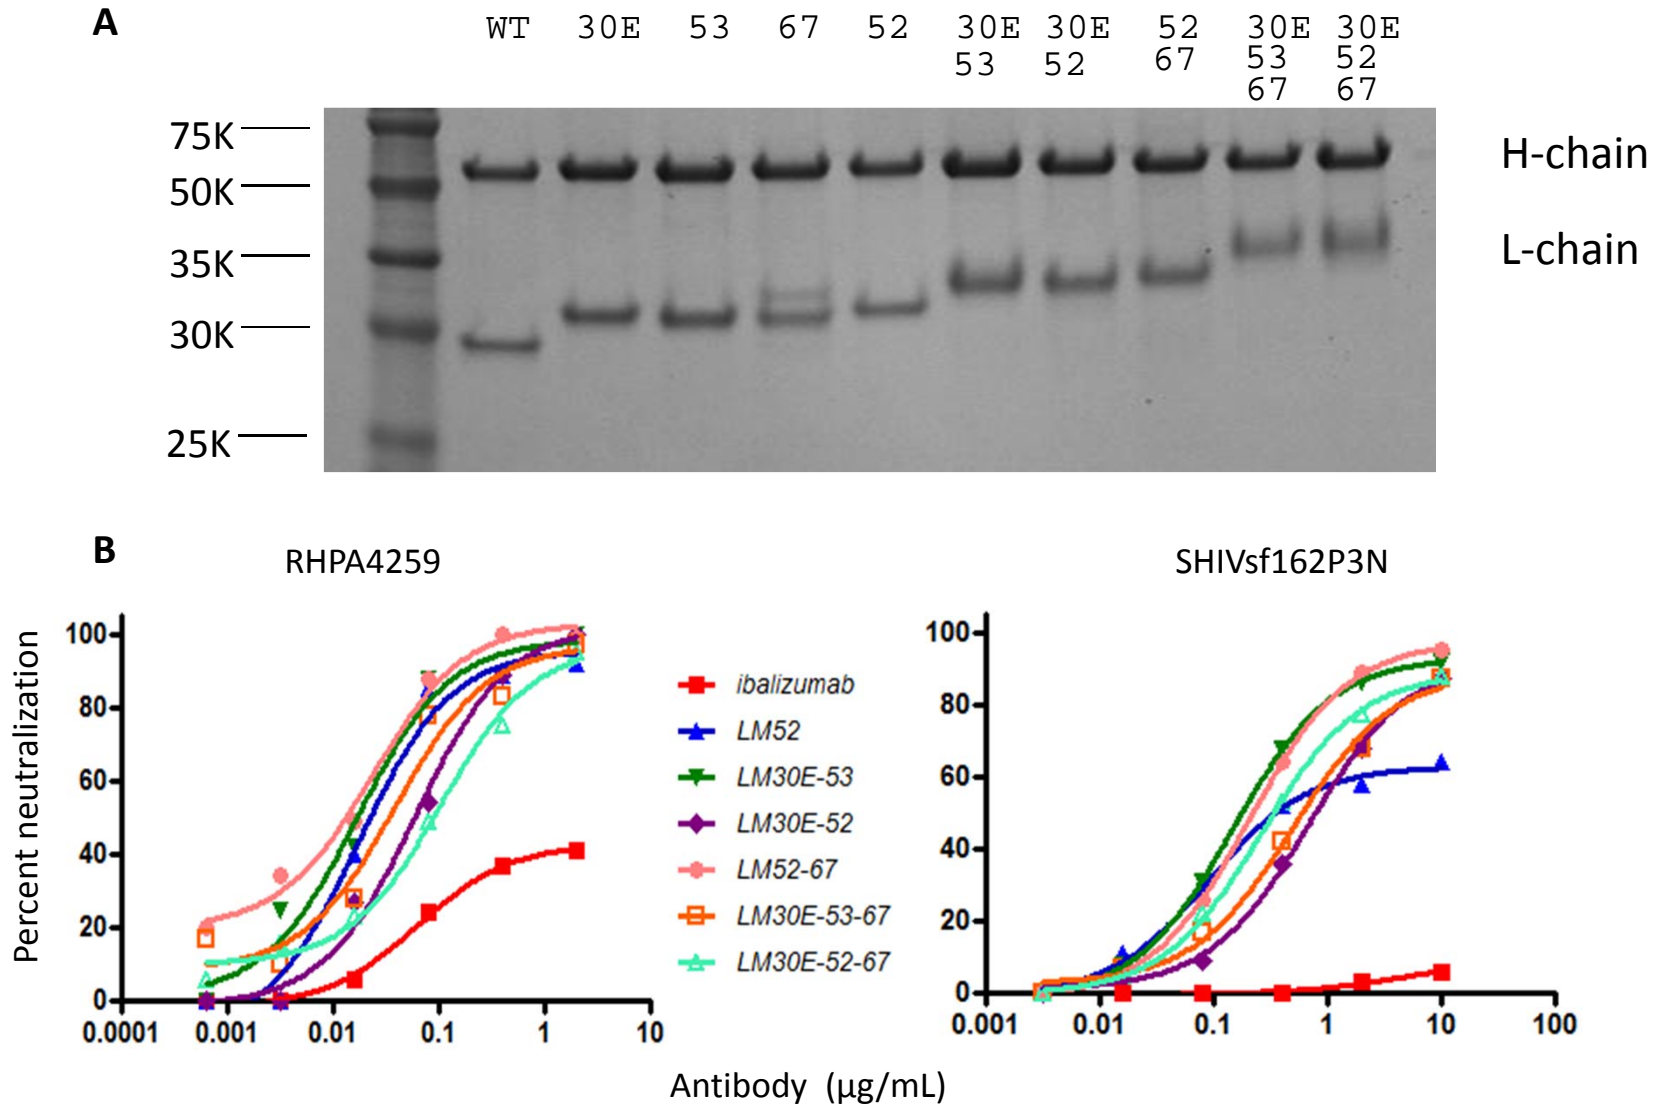

Figure S5

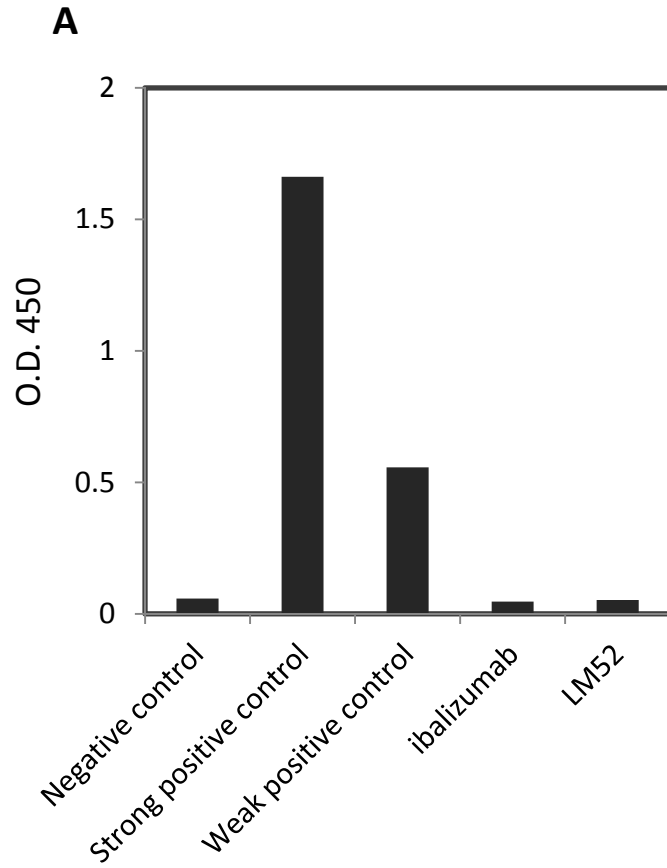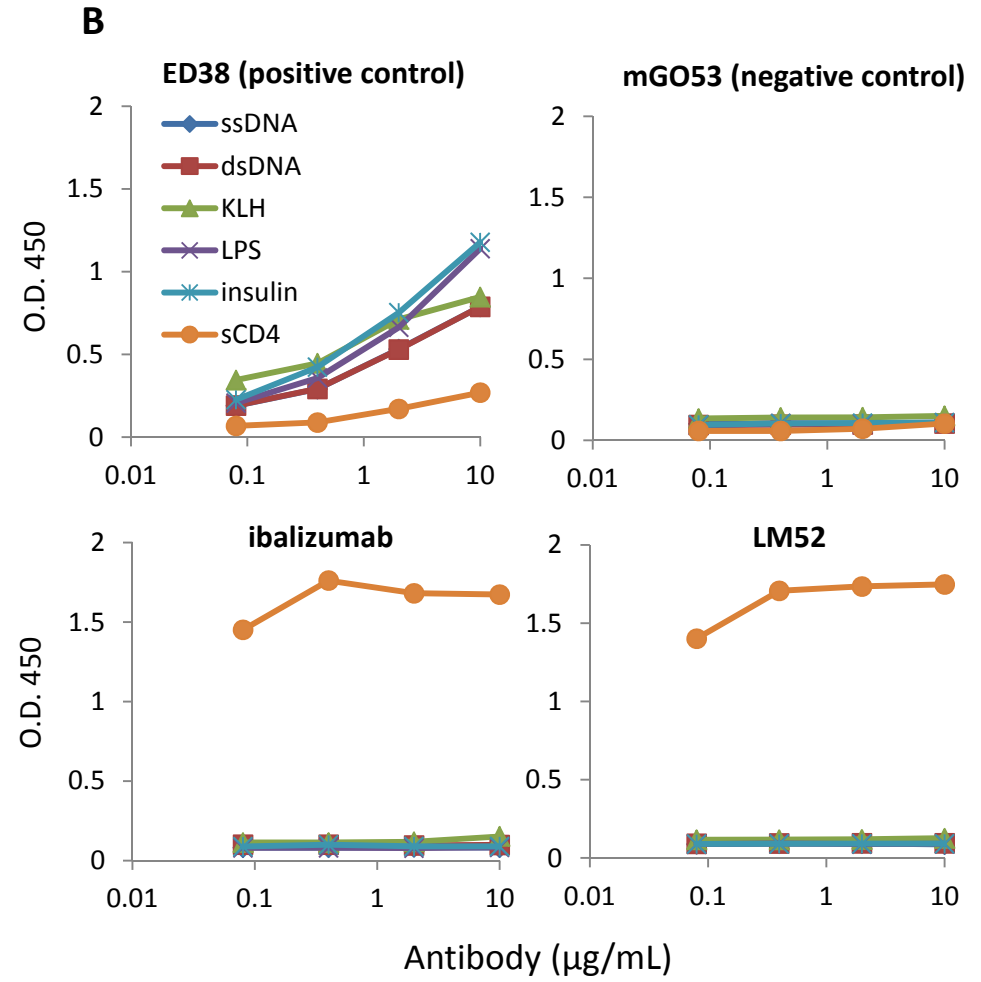

Table S1. The binding kinetics of ibalizumab and its LMs to human CD4

| Antibody   | $K_{on}$<br>( $10^5/Ms$ ) | $K_{off}$<br>( $10^{-5}/s$ ) | $K_D$<br>(0.1 nM) |
|------------|---------------------------|------------------------------|-------------------|
| ibalizumab | 2.8                       | 12                           | 4.3               |
| LM30E      | 1.1                       | 15                           | 14                |
| LM52       | 4.6                       | 16                           | 3.5               |
| LM53       | 2.9                       | 13                           | 4.5               |
| LM54       | 3.7                       | 27                           | 7.3               |
| LM60       | 4.4                       | 8.3                          | 1.9               |
| LM65       | 3.3                       | 49                           | 15                |
| LM67       | 2.5                       | 20                           | 8                 |
| LM76       | 5.0                       | 14                           | 2.8               |

Table S2. Comparison of ibalizumab and its light chain mutants

|                                            | WT   | LM30E       | LM52        | LM53        | LM54        | LM65        | LM67        | LM60 | LM76 |
|--------------------------------------------|------|-------------|-------------|-------------|-------------|-------------|-------------|------|------|
| Mean MPI (%)                               | 75   | <b>98</b>   | <b>98</b>   | <b>99</b>   | <b>93</b>   | <b>93</b>   | <b>91</b>   | 75   | 78   |
| Distance (Å) to V5                         |      | <b>11.1</b> | <b>19.8</b> | <b>19.8</b> | <b>23.3</b> | <b>21.3</b> | <b>18.9</b> | 27.6 | 31.2 |
| IC <sub>80</sub> (µg/mL)<br>Geometric mean | 0.87 | <b>0.14</b> | <b>0.05</b> | <b>0.09</b> | <b>0.28</b> | <b>0.20</b> | <b>0.05</b> | 1.5  | 0.75 |

Table S4. Comparison of the IC<sub>80</sub>(µg/mL) of ibalizumab and its single, double, and triple LMs

| Virus          | ibalizumab | LM52 | LM30E-53 | LM30E-52 | LM52-67 | LM30E-53-67 | LM30E-52-67 |
|----------------|------------|------|----------|----------|---------|-------------|-------------|
| RHPA4259       | >10        | 0.03 | 0.02     | 0.10     | 0.02    | 0.06        | 0.23        |
| SHIVsf162P3    | >10        | 0.37 | 0.32     | 0.61     | 0.37    | 0.68        | 0.89        |
| SHIVsf162P3N   | >10        | >10  | 0.93     | 4.40     | 0.98    | 4.40        | 2.50        |
| 9015-07 A1     | 0.24       | 0.04 | 0.04     | 0.06     | 0.04    | 0.08        | 0.13        |
| 1051-D927 TD12 | >10        | 0.04 | 0.05     | 0.09     | 0.04    | 0.20        | 0.32        |
| Q769.d22       | >10        | 0.13 | 0.15     | 0.29     | 0.11    | 0.47        | 0.49        |
| 16055-2.3      | >10        | 0.04 | 0.06     | 0.08     | 0.05    | 0.13        | 0.24        |
| 246F C1G C     | >10        | 0.07 | 0.10     | 0.22     | 0.02    | 0.30        | 0.49        |
| QG393.60M      | >10        | 0.05 | 0.05     | 0.07     | 0.04    | 0.10        | 0.11        |
| ZM249M.PL1     | 0.22       | 0.05 | 0.06     | 0.12     | 0.05    | 0.10        | 0.13        |
| Q259.d2.17     | 0.37       | 0.09 | 0.10     | 0.15     | 0.07    | 0.13        | 0.26        |
| Q461.e2        | 0.61       | 0.09 | 0.10     | 0.14     | 0.09    | 0.16        | 0.18        |
| Geometric Mean | 3.20       | 0.10 | 0.09     | 0.18     | 0.07    | 0.22        | 0.31        |
