# Supplementary material
Source: PubMed Central journal article supplement (PMC3825789)
Supplement: NIHMS511374-supplement-2.pdf [file NIHMS511374-supplement-2.pdf]

Table S3. In vitro neutralization profiles of ibalizumab and LM52 as expressed by IC<sub>50</sub> (µg/mL), IC<sub>80</sub> (µg/mL), and MPI (%).

| Virus             | Clade   | Ibalizumab                  |                             |            | LM52                        |                             |            |
|-------------------|---------|-----------------------------|-----------------------------|------------|-----------------------------|-----------------------------|------------|
|                   |         | IC <sub>50</sub><br>(µg/mL) | IC <sub>80</sub><br>(µg/mL) | MPI<br>(%) | IC <sub>50</sub><br>(µg/mL) | IC <sub>80</sub><br>(µg/mL) | MPI<br>(%) |
| 6535.3            | B       | 0.01                        | 0.05                        | 99         | 0.012                       | 0.034                       | 100        |
| QH0692.42         | B       | 0.03                        | 0.14                        | 85         | 0.023                       | 0.051                       | 100        |
| SC422661.8        | B       | 0.04                        | >10                         | 77         | 0.019                       | 0.037                       | 100        |
| PVO.4             | B       | 0.02                        | 0.09                        | 89         | 0.019                       | 0.036                       | 100        |
| TRO.11            | B       | 0.01                        | 0.05                        | 91         | 0.015                       | 0.035                       | 100        |
| AC10.0.29         | B       | 0.02                        | 0.04                        | 98         | 0.013                       | 0.029                       | 100        |
| RHPA4259.7        | B       | >10                         | >10                         | 42         | 0.027                       | 0.076                       | 91         |
| THRO4156.18       | B       | 0.06                        | >10                         | 78         | 0.022                       | 0.062                       | 99         |
| REJO4541.67       | B       | 0.02                        | 0.37                        | 82         | 0.015                       | 0.043                       | 99         |
| TRJO4551.58       | B       | 2.05                        | >10                         | 62         | 0.01                        | 0.027                       | 100        |
| WITO4160.33       | B       | 0.02                        | 0.43                        | 83         | 0.013                       | 0.036                       | 100        |
| CAAN5342.A2       | B       | 0.01                        | 0.03                        | 100        | 0.013                       | 0.028                       | 100        |
| WEAU_d15_410_5017 | B (T/F) | 0.02                        | 10.00                       | 80         | 0.019                       | 0.043                       | 100        |
| 1006_11_C3_1601   | B (T/F) | >10                         | >10                         | 46         | 0.019                       | 0.053                       | 98         |
| 1054_07_TC4_1499  | B (T/F) | 0.03                        | >10                         | 79         | 0.018                       | 0.041                       | 100        |
| 1056_10_TA11_1826 | B (T/F) | 0.01                        | 0.02                        | 98         | 0.013                       | 0.031                       | 100        |
| 1012_11_TC21_3257 | B (T/F) | 0.03                        | 0.09                        | 92         | 0.009                       | 0.027                       | 100        |
| 6240_08_TA5_4622  | B (T/F) | 0.02                        | 0.05                        | 99         | 0.0011                      | 0.03                        | 100        |
| 6244_13_B5_4576   | B (T/F) | 0.01                        | 0.03                        | 98         | 0.009                       | 0.026                       | 100        |
| 62357_14_D3_4589  | B (T/F) | 0.03                        | 9.49                        | 80         | 0.013                       | 0.046                       | 100        |
| SC05_8C11_2344    | B (T/F) | 0.01                        | 0.03                        | 97         | 0.009                       | 0.032                       | 100        |
| Du156.12          | C       | 0.01                        | 0.03                        | 100        | 0.005                       | 0.012                       | 100        |
| Du172.17          | C       | 0.01                        | 0.04                        | 88         | 0.011                       | 0.026                       | 100        |
| Du422.1           | C       | 0.03                        | 0.07                        | 98         | 0.013                       | 0.035                       | 100        |
| ZM197M.PB7        | C       | 0.01                        | 0.02                        | 99         | 0.012                       | 0.034                       | 100        |
| ZM214M.PL15       | C       | 0.01                        | 0.04                        | 94         | 0.005                       | 0.024                       | 100        |
| ZM233M.PB6        | C       | 0.03                        | 1.84                        | 81         | 0.015                       | 0.043                       | 100        |
| ZM249M.PL1        | C       | 0.03                        | 0.12                        | 91         | 0.011                       | 0.038                       | 100        |
| ZM53M.PB12        | C       | 0.10                        | >10                         | 77         | 0.022                       | 0.051                       | 100        |
| ZM109F.PB4        | C       | 3.90                        | >10                         | 24         | 0.028                       | 0.064                       | 99         |
| ZM135M.PL10a      | C       | 0.10                        | >10                         | 66         | 0.012                       | 0.035                       | 100        |
| CAP45.2.00.G3     | C       | 0.03                        | 0.09                        | 93         | 0.009                       | 0.029                       | 100        |
| CAP210.2.00.E8    | C       | 0.05                        | 0.12                        | 99         | 0.021                       | 0.046                       | 100        |
| HIV-001428-2.42   | C       | >10                         | >10                         | 36         | 0.036                       | 0.077                       | 99         |
| HIV-0013095-2.11  | C       | 0.29                        | >10                         | 59         | 0.035                       | 0.075                       | 100        |
| HIV-16055-2.3     | C       | 0.11                        | >10                         | 76         | 0.02                        | 0.053                       | 100        |
| HIV-16845-2.22    | C       | 0.06                        | 0.29                        | 86         | 0.017                       | 0.049                       | 100        |
| Ce1086_B2         | C (T/F) | 0.04                        | 0.09                        | 97         | 0.009                       | 0.031                       | 100        |
| Ce0393_C3         | C (T/F) | 0.02                        | 0.03                        | 99         | 0.005                       | 0.014                       | 100        |
| Ce1176_A3         | C (T/F) | 0.04                        | 0.11                        | 94         | 0.011                       | 0.025                       | 100        |
| Ce2010_F5         | C (T/F) | 0.05                        | 0.24                        | 87         | 0.011                       | 0.029                       | 100        |

| Virus              | Clade    | Ibalizumab                  |                             |            | LM52                        |                             |            |
|--------------------|----------|-----------------------------|-----------------------------|------------|-----------------------------|-----------------------------|------------|
|                    |          | IC <sub>50</sub><br>(µg/mL) | IC <sub>80</sub><br>(µg/mL) | MPI<br>(%) | IC <sub>50</sub><br>(µg/mL) | IC <sub>80</sub><br>(µg/mL) | MPI<br>(%) |
| Ce0682_E4          | C (T/F)  | 0.05                        | 0.52                        | 82         | 0.005                       | 0.017                       | 100        |
| Ce1172_H1          | C (T/F)  | 0.03                        | 0.07                        | 93         | 0.008                       | 0.027                       | 100        |
| Ce2060_G9          | C (T/F)  | >10                         | >10                         | 41         | 0.012                       | 0.031                       | 100        |
| Ce703010054_2A2    | C (T/F)  | 9.01                        | >10                         | 51         | 0.062                       | 0.255                       | 88         |
| BF1266.431a        | C (T/F)  | 0.02                        | 0.05                        | 99         | 0.009                       | 0.024                       | 100        |
| 246F C1G           | C (T/F)  | 0.34                        | >10                         | 71         | 0.021                       | 0.049                       | 100        |
| 249M B10           | C (T/F)  | 0.03                        | 0.10                        | 94         | 0.007                       | 0.02                        | 100        |
| ZM247v1(Rev-)      | C (T/F)  | 0.09                        | >10                         | 74         | 0.028                       | 0.061                       | 100        |
| 7030102001E5(Rev-) | C (T/F)  | 0.02                        | 0.08                        | 97         | 0.015                       | 0.034                       | 100        |
| 1394C9G1(Rev-)     | C (T/F)  | 0.02                        | 0.05                        | 97         | 0.014                       | 0.026                       | 100        |
| Ce704809221_1B3    | C (T/F)  | 0.16                        | >10                         | 70         | 0.02                        | 0.048                       | 99         |
| CNE19              | BC       | 0.06                        | >10                         | 78         | 0.027                       | 0.059                       | 100        |
| CNE20              | BC       | 0.03                        | 0.06                        | 92         | 0.019                       | 0.041                       | 100        |
| CNE21              | BC       | 0.08                        | 0.32                        | 89         | 0.035                       | 0.074                       | 100        |
| CNE17              | BC       | 0.04                        | 0.15                        | 86         | 0.015                       | 0.038                       | 100        |
| CNE30              | BC       | 0.10                        | >10                         | 73         | 0.033                       | 0.071                       | 99         |
| CNE52              | BC       | 0.12                        | >10                         | 69         | 0.017                       | 0.037                       | 100        |
| CNE53              | BC       | 3.36                        | >10                         | 57         | 0.018                       | 0.04                        | 100        |
| CNE58              | BC       | 0.03                        | 0.07                        | 93         | 0.017                       | 0.035                       | 100        |
| MS208.A1           | A        | 0.03                        | 0.07                        | 99         | 0.029                       | 0.063                       | 100        |
| Q23.17             | A        | 3.40                        | >10                         | 50         | 0.017                       | 0.037                       | 100        |
| Q461.e2            | A        | 0.05                        | 0.54                        | 82         | 0.018                       | 0.035                       | 100        |
| Q769.d22           | A        | >10                         | >10                         | 34         | 0.019                       | 0.052                       | 99         |
| Q259.d2.17         | A        | 0.04                        | 0.19                        | 87         | 0.019                       | 0.043                       | 99         |
| Q842.d12           | A        | 0.02                        | 0.09                        | 93         | 0.009                       | 0.023                       | 100        |
| 0330.v4.c3         | A        | 0.25                        | >10                         | 64         | 0.028                       | 0.078                       | 97         |
| 0260.v5.c36        | A        | 0.04                        | 0.12                        | 93         | 0.013                       | 0.035                       | 100        |
| 191955_A11         | A (T/F)  | 0.04                        | 0.09                        | 96         | 0.023                       | 0.052                       | 100        |
| 191084 B7-19       | A (T/F)  | 0.04                        | 0.10                        | 91         | 0.009                       | 0.024                       | 100        |
| 9004SS_A3_4        | A (T/F)  | 0.04                        | 0.13                        | 88         | 0.021                       | 0.048                       | 100        |
| T257-31            | CRF02_AG | 0.02                        | 0.05                        | 99         | 0.012                       | 0.032                       | 100        |
| 928-28             | CRF02_AG | 0.05                        | 0.12                        | 92         | 0.028                       | 0.063                       | 100        |
| 263-8              | CRF02_AG | 0.02                        | 0.07                        | 92         | 0.016                       | 0.035                       | 100        |
| T250-4             | CRF02_AG | 0.02                        | 0.06                        | 97         | 0.023                       | 0.052                       | 100        |
| T251-18            | CRF02_AG | 0.03                        | 0.07                        | 97         | 0.023                       | 0.052                       | 100        |
| T278-50            | CRF02_AG | >10                         | >10                         | 48         | 0.016                       | 0.045                       | 98         |
| T255-34            | CRF02_AG | 0.90                        | >10                         | 61         | 0.017                       | 0.052                       | 100        |
| 211-9              | CRF02_AG | 0.03                        | 0.07                        | 96         | 0.015                       | 0.043                       | 100        |
| 235-47             | CRF02_AG | 0.02                        | 0.04                        | 97         | 0.009                       | 0.026                       | 100        |
| 620345.c01         | CRF01_AE | 0.03                        | 0.22                        | 83         | 0.004                       | 0.015                       | 100        |
| 703357.c02         | CRF01_AE | 0.02                        | 0.05                        | 100        | 0.009                       | 0.024                       | 100        |

| Virus                 | Clade             | Ibalizumab                  |                             |            | LM52                        |                             |            |
|-----------------------|-------------------|-----------------------------|-----------------------------|------------|-----------------------------|-----------------------------|------------|
|                       |                   | IC <sub>50</sub><br>(µg/mL) | IC <sub>80</sub><br>(µg/mL) | MPI<br>(%) | IC <sub>50</sub><br>(µg/mL) | IC <sub>80</sub><br>(µg/mL) | MPI<br>(%) |
| C1080.c03             | CRF01_AE          | 0.03                        | 0.12                        | 84         | 0.009                       | 0.029                       | 100        |
| R2184.c04             | CRF01_AE          | 0.03                        | 0.06                        | 96         | 0.007                       | 0.024                       | 100        |
| R1166.c01             | CRF01_AE          | 0.02                        | 0.05                        | 97         | 0.006                       | 0.017                       | 100        |
| R3265.c06             | CRF01_AE          | 0.02                        | 0.67                        | 82         | 0.004                       | 0.02                        | 100        |
| C2101.c01             | CRF01_AE          | 0.04                        | 0.08                        | 97         | 0.014                       | 0.037                       | 100        |
| C3347.c11             | CRF01_AE          | 0.01                        | 0.04                        | 98         | 0.004                       | 0.011                       | 100        |
| C4118.c09             | CRF01_AE          | 0.04                        | 0.09                        | 92         | 0.01                        | 0.034                       | 100        |
| CNE5                  | CRF01_AE          | 0.04                        | 0.08                        | 98         | 0.017                       | 0.045                       | 100        |
| BJOX009000.02.4       | CRF01_AE          | 0.03                        | 0.10                        | 92         | 0.011                       | 0.031                       | 100        |
| BJOX015000.11.5       | CRF01_AE<br>(T/F) | 0.03                        | 0.13                        | 88         | 0.006                       | 0.036                       | 100        |
| BJOX010000.06.2       | CRF01_AE<br>(T/F) | 0.02                        | 0.04                        | 99         | 0.007                       | 0.019                       | 100        |
| BJOX025000.01.1       | CRF01_AE<br>(T/F) | 0.02                        | 0.06                        | 97         | 0.014                       | 0.031                       | 100        |
| BJOX028000.10.3       | CRF01_AE<br>(T/F) | 0.01                        | 0.22                        | 90         | 0.004                       | 0.019                       | 100        |
| X1193_c1              | G                 | 0.03                        | 0.06                        | 99         | 0.005                       | 0.012                       | 100        |
| P0402_c2_11           | G                 | 0.04                        | 0.09                        | 99         | 0.007                       | 0.018                       | 100        |
| X1254_c3              | G                 | 0.13                        | >10                         | 75         | 0.019                       | 0.044                       | 100        |
| X2088_c9              | G                 | 0.07                        | >10                         | 79         | 0.016                       | 0.036                       | 100        |
| X2131_C1_B5           | G                 | 0.20                        | >10                         | 57         | 0.017                       | 0.056                       | 99         |
| P1981_C5_3            | G                 | 0.12                        | >10                         | 73         | 0.013                       | 0.029                       | 100        |
| X1632_S2_B10          | G                 | >10                         | >10                         | 15         | 0.03                        | 0.143                       | 83         |
| 3016.v5.c45           | D                 | 0.07                        | 0.13                        | 93         | 0.022                       | 0.041                       | 100        |
| A07412M1.vrc12        | D                 | 1.76                        | >10                         | 57         | 0.013                       | 0.035                       | 99         |
| 231965.c01            | D                 | 0.10                        | >10                         | 69         | 0.022                       | 0.066                       | 100        |
| 231966.c02            | D                 | 0.03                        | 0.08                        | 96         | 0.005                       | 0.018                       | 100        |
| 191821_E6_1           | D (T/F)           | 0.10                        | >10                         | 75         | 0.022                       | 0.06                        | 99         |
| 3817.v2.c59           | CD                | 0.04                        | 0.07                        | 98         | 0.005                       | 0.012                       | 100        |
| 6480.v4.c25           | CD                | 0.03                        | 0.10                        | 93         | 0.011                       | 0.04                        | 100        |
| 6952.v1.c20           | CD                | 0.07                        | >10                         | 71         | 0.019                       | 0.051                       | 100        |
| 6811.v7.c18           | CD                | 0.16                        | >10                         | 72         | 0.021                       | 0.058                       | 100        |
| 89-F1_2_25            | CD                | 0.16                        | 6.54                        | 81         | 0.053                       | 0.195                       | 97         |
| 3301.v1.c24           | AC                | 0.55                        | >10                         | 63         | 0.012                       | 0.032                       | 100        |
| 6041.v3.c23           | AC                | >10                         | >10                         | 46         | 0.019                       | 0.051                       | 98         |
| 6540.v4.c1            | AC                | 0.06                        | >10                         | 74         | 0.017                       | 0.047                       | 100        |
| 6545.v4.c1            | AC                | 0.23                        | >10                         | 71         | 0.025                       | 0.069                       | 99         |
| 0815.v3.c3            | ACD               | >10                         | >10                         | 44         | 0.019                       | 0.053                       | 99         |
| 3103.v3.c10           | ACD               | 0.03                        | 0.07                        | 98         | 0.009                       | 0.024                       | 100        |
| Murine leukemia virus | Control           | ND                          | ND                          | ND         | >10                         | >10                         | 3          |
